# Supplementary material
Source: publisher figshare collection journal article supplement (https://f1000.figshare.com/ndownloader/files/1503903)
Supplement: Supplementary file 1 [file 1503903]

Sl.No	Treatment details	Description of components in assay buffer	Arbitary Fluorescent units #1	Arbitary Fluorescent units #2	Average of Arbitary Fluorescent units	Average of Arbitary Fluorescent units [Blank substracted] #1	Average of Arbitary Fluorescent units [Blank substracted] #2	Fold increase in total enzyme activity w.r.t control #1	Fold increase in total enzyme activity w.r.t control #2	Average fold increase in total enzyme activity w.r.t control #2	Standard Deviation among replicates
1	Blank	Flour-De-Lys Sirt1 substrate+ Trichostatin	1635.0	1665.0	1650.0	-442.3
2	0	Flour-De-Lys Sirt1 substrate +Co-factor+ rHos2 protein+ Trichostatin	5075.0	5236.0	5155.5	3195.5
3	25µM Substrate+ 500µM Nicotinamide+30 µM Resveratrol+ 2µM Trichostatin+ 300ng rHos2	Flour-De-Lys Sirt1 substrate +Co-factor +30µMSirt1 activator+ Trichostatin + rHos2 protein	7279.0	7592.0	7435.5	3880.5	4193.5	1.0	1.0	1.0	0.00
4	25µM Substrate+500µM Nicotinamide+100 µM Resveratrol+ 2µM Trichostatin+ 300ng rHos2	Flour-De-Lys Sirt1 substrate+Co-factor+100 µMSirt1 activator+ Trichostatin + rHos2 protein	9548.0	9553.0	9550.5	4595.3	4600.3	1.2	1.1	1.1	0.06
5	25µM Substrate+500µM Nicotinamide+250 µM Resveratrol+ 2µM Trichostatin+ 300ng rHos2	Flour-De-Lys Sirt1 substrate + Co-factor+250 µMSirt1 activator+ Trichostatin + rHos2 protein	11699.0	12948.0	12323.5	3326.3	4575.3	0.9	1.1	1.0	0.17
6	25µM Substrate+500µM Nicotinamide+500 µM Resveratrol+ 2µM Trichostatin+ 300ng rHos2	Flour-De-Lys Sirt1 substrate +Co-factor +500 µMSirt1 activator+ Trichostatin + rHos2 protein	15082.0	14051.0	14566.5	4336.0	3305.0	1.1	0.8	1.0	0.23
